# Supplementary material
Source: Springer Nature journal article supplement (https://www.springermedizin.de/resource/supplementary/13601_2014_1060_MOESM1_ESM.pdf/9678610)

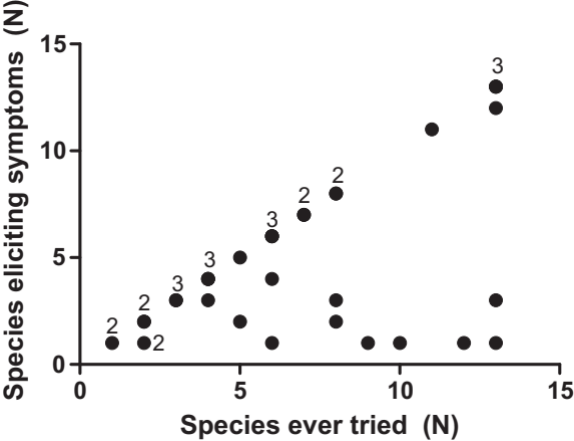

Supplement: MOESM1 [file 9678610]
